# Supplementary material
Source: publisher site journal article supplement (https://www.dovepress.com/article/325996)
Supplement: Supplementary file 1 [file get_supplementary_file.php]

**Supplementary Materials**

**Multifarious biological applications and toxic Hg2+ sensing potentiality of biogenic silver nanoparticles based on *securidaca inappendiculata Hassk* stem extract**

**Figure S1** Base peak chromatogram of elute from *S. inappendiculata* stem bark extract analysed in negative electrospray ionization mode.

**Table S1** Putative identities of chemical components present in *S. inappendiculata* stem bark extract obtained by LC-ESI-QTOF analysis

|  |  |  |  |  |  |  |  |  |
| --- | --- | --- | --- | --- | --- | --- | --- | --- |
| S/N | **Rt**  **(min)** | **m/z** | **Accurate mass (Da)** | **Mass Diff (ppm)** | **Calculated mass (Da)** | **Predicted Formula** | **Score (DB)** | **Tentative identity of compound** |
| 1 | 6.201 | 537.1846 | 478.1707 | -4.34 | 478.1686 | C20 H30 O13 | 90.29 | Kelampayoside A |
| 2 | 6.452 | 259.0829 | 260.0902 | -2.36 | 260.0896 | C11 H16 O7 | 97.99 | 3-Furanmethanol glucoside |
| 3 | 6.602 | 517.1564 | 472.1583 | -0.53 | 472.1581 | C21 H28 O12 | 98.74 | 1-O-Cinnamoyl-beta-D-gentiobiose |
| 4 | 6.866 | 585.2195 | 540.2211 | -0.79 | 540.2207 | C26 H36 O12 | 98.59 | Sambacin |
| 5 | 6.929 | 313.0933 | 314.1005 | -1.1 | 314.1002 | C14 H18 O8 | 98.82 | 2-O-Acetylarbutin |
| 6 | 7.255 | 783.235 | 784.2425 | 0.06 | 784.2426 | C35 H44 O20 | 99.12 | Rhamnazin 3-isorhamninoside |
| 7 | 7.707 | 567.2088 | 568.2146 | 1.67 | 568.2156 | C27 H36 O13 | 80.55 | Citrusin B |
| 8 | 7.732 | 339.1092 | 340.1164 | -1.71 | 340.1158 | C16 H20 O8 | 82.99 | Oenanthoside A |
| 9 | 7.908 | 435.0951 | 436.1023 | -3.96 | 436.1006 | C20 H20 O11 | 92.66 | Irisxanthone |
| 10 | 7.958 | 741.2637 | 742.2708 | -3.25 | 742.2684 | C34 H46 O18 | 92.74 | Acanthoside D |
| 11 | 8.071 | 569.1878 | 570.1951 | -0.35 | 570.1949 | C26 H34 O14 | 99.59 | 2''-Methoxy-(S)-oleuropein |
| 12 | 8.234 | 683.2228 | 684.2302 | 2.49 | 684.2319 | C37 H36 N2O11 | 87 | Citbismine C |
| 13 | 8.31 | 723.2172 | 724.2238 | -3.26 | 724.2215 | C33 H40 O18 | 90.24 | Natsudaidain 3-(4-O-3-hydroxy-3-methylglutaroylglucoside) |
| 14 | 8.46 | 693.2044 | 694.2114 | -0.67 | 694.2109 | C32 H38 O17 | 98.76 | Neocuscutoside C |
| 15 | 8.535 | 593.1506 | 594.1588 | -0.5 | 594.1585 | C27 H30 O15 | 82.94 | Vitexin 4'-O-galactoside |
| 16 | 8.711 | 621.1831 | 622.1905 | -1.23 | 622.1898 | C29 H34 O15 | 98.28 | Pectolinarin |
| 17 | 8.837 | 697.2365 | 652.2384 | -2.54 | 652.2367 | C31 H40 O15 | 95.71 | (-)-Matairesinol 4'-[apiosyl-(1->2)-glucoside] |
| 18 | 8.937 | 521.1318 | 522.1391 | -3.31 | 522.1373 | C24 H26 O13 | 93.86 | Centaurein |
| 19 | 8.987 | 597.1828 | 598.1908 | -1.73 | 598.1898 | C27 H34 O15 | 84.78 | 10-Acetoxyoleuropein |
| 20 | 9.389 | 355.1046 | 356.1118 | -3.05 | 356.1107 | C16 H20 O9 | 95.27 | 1-O-2'-Hydroxy-4'-methoxycinnamoyl-b-D-glucose |
| 21 | 9.59 | 411.1304 | 412.1375 | -1.39 | 412.1369 | C19 H24 O10 | 98.58 | Methylpicraquassioside A |
| 22 | 9.716 | 547.1455 | 548.1529 | 0.21 | 548.153 | C26 H28 O13 | 98.88 | Mirificin |
| 23 | 9.929 | 365.0881 | 366.0954 | -0.82 | 366.0951 | C17 H18 O9 | 99.39 | Furocoumarinic acid glucoside |
| 24 | 10.64 | 303.0502 | 304.0574 | 2.95 | 304.0583 | C15 H12 O7 | 95.61 | Pratenol B |
| 25 | 10.77 | 329.234 | 330.2412 | -1.73 | 330.2406 | C18 H34 O5 | 98.67 | 11,12,13-trihydroxy-9-octadecenoic acid |
|  |  |  |  |  |  |  |  |  |
| 27 | 11.12 | 303.0512 | 304.0584 | -0.38 | 304.0583 | C15 H12 O7 | 99.62 | Alphitonin |
| 28 | 11.6 | 287.0569 | 288.0642 | -2.73 | 288.0634 | C15 H12 O6 | 96.81 | Eriodictyol |
| 29 | 12.28 | 307.1911 | 308.1987 | 0.19 | 308.1988 | C18 H28 O4 | 91.32 | 5-O-Methylembelin |
| 30 | 12.38 | 227.035 | 228.0423 | -0.32 | 228.0423 | C13 H8 O4 | 99.21 | Euxanthone |
| 31 | 13.16 | 293.1763 | 294.1836 | -1.52 | 294.1831 | C17 H26 O4 | 98.79 | Embelin |
| 32 | 17.7 | 563.3443 | 518.3459 | -0.84 | 518.3455 | C27 H50 O9 | 97.29 | 3-O-L-rhamnosyl-3-hydroxydecanoyl-3-hydroxydecanoic acid |

Rt: retention time

a

b

c


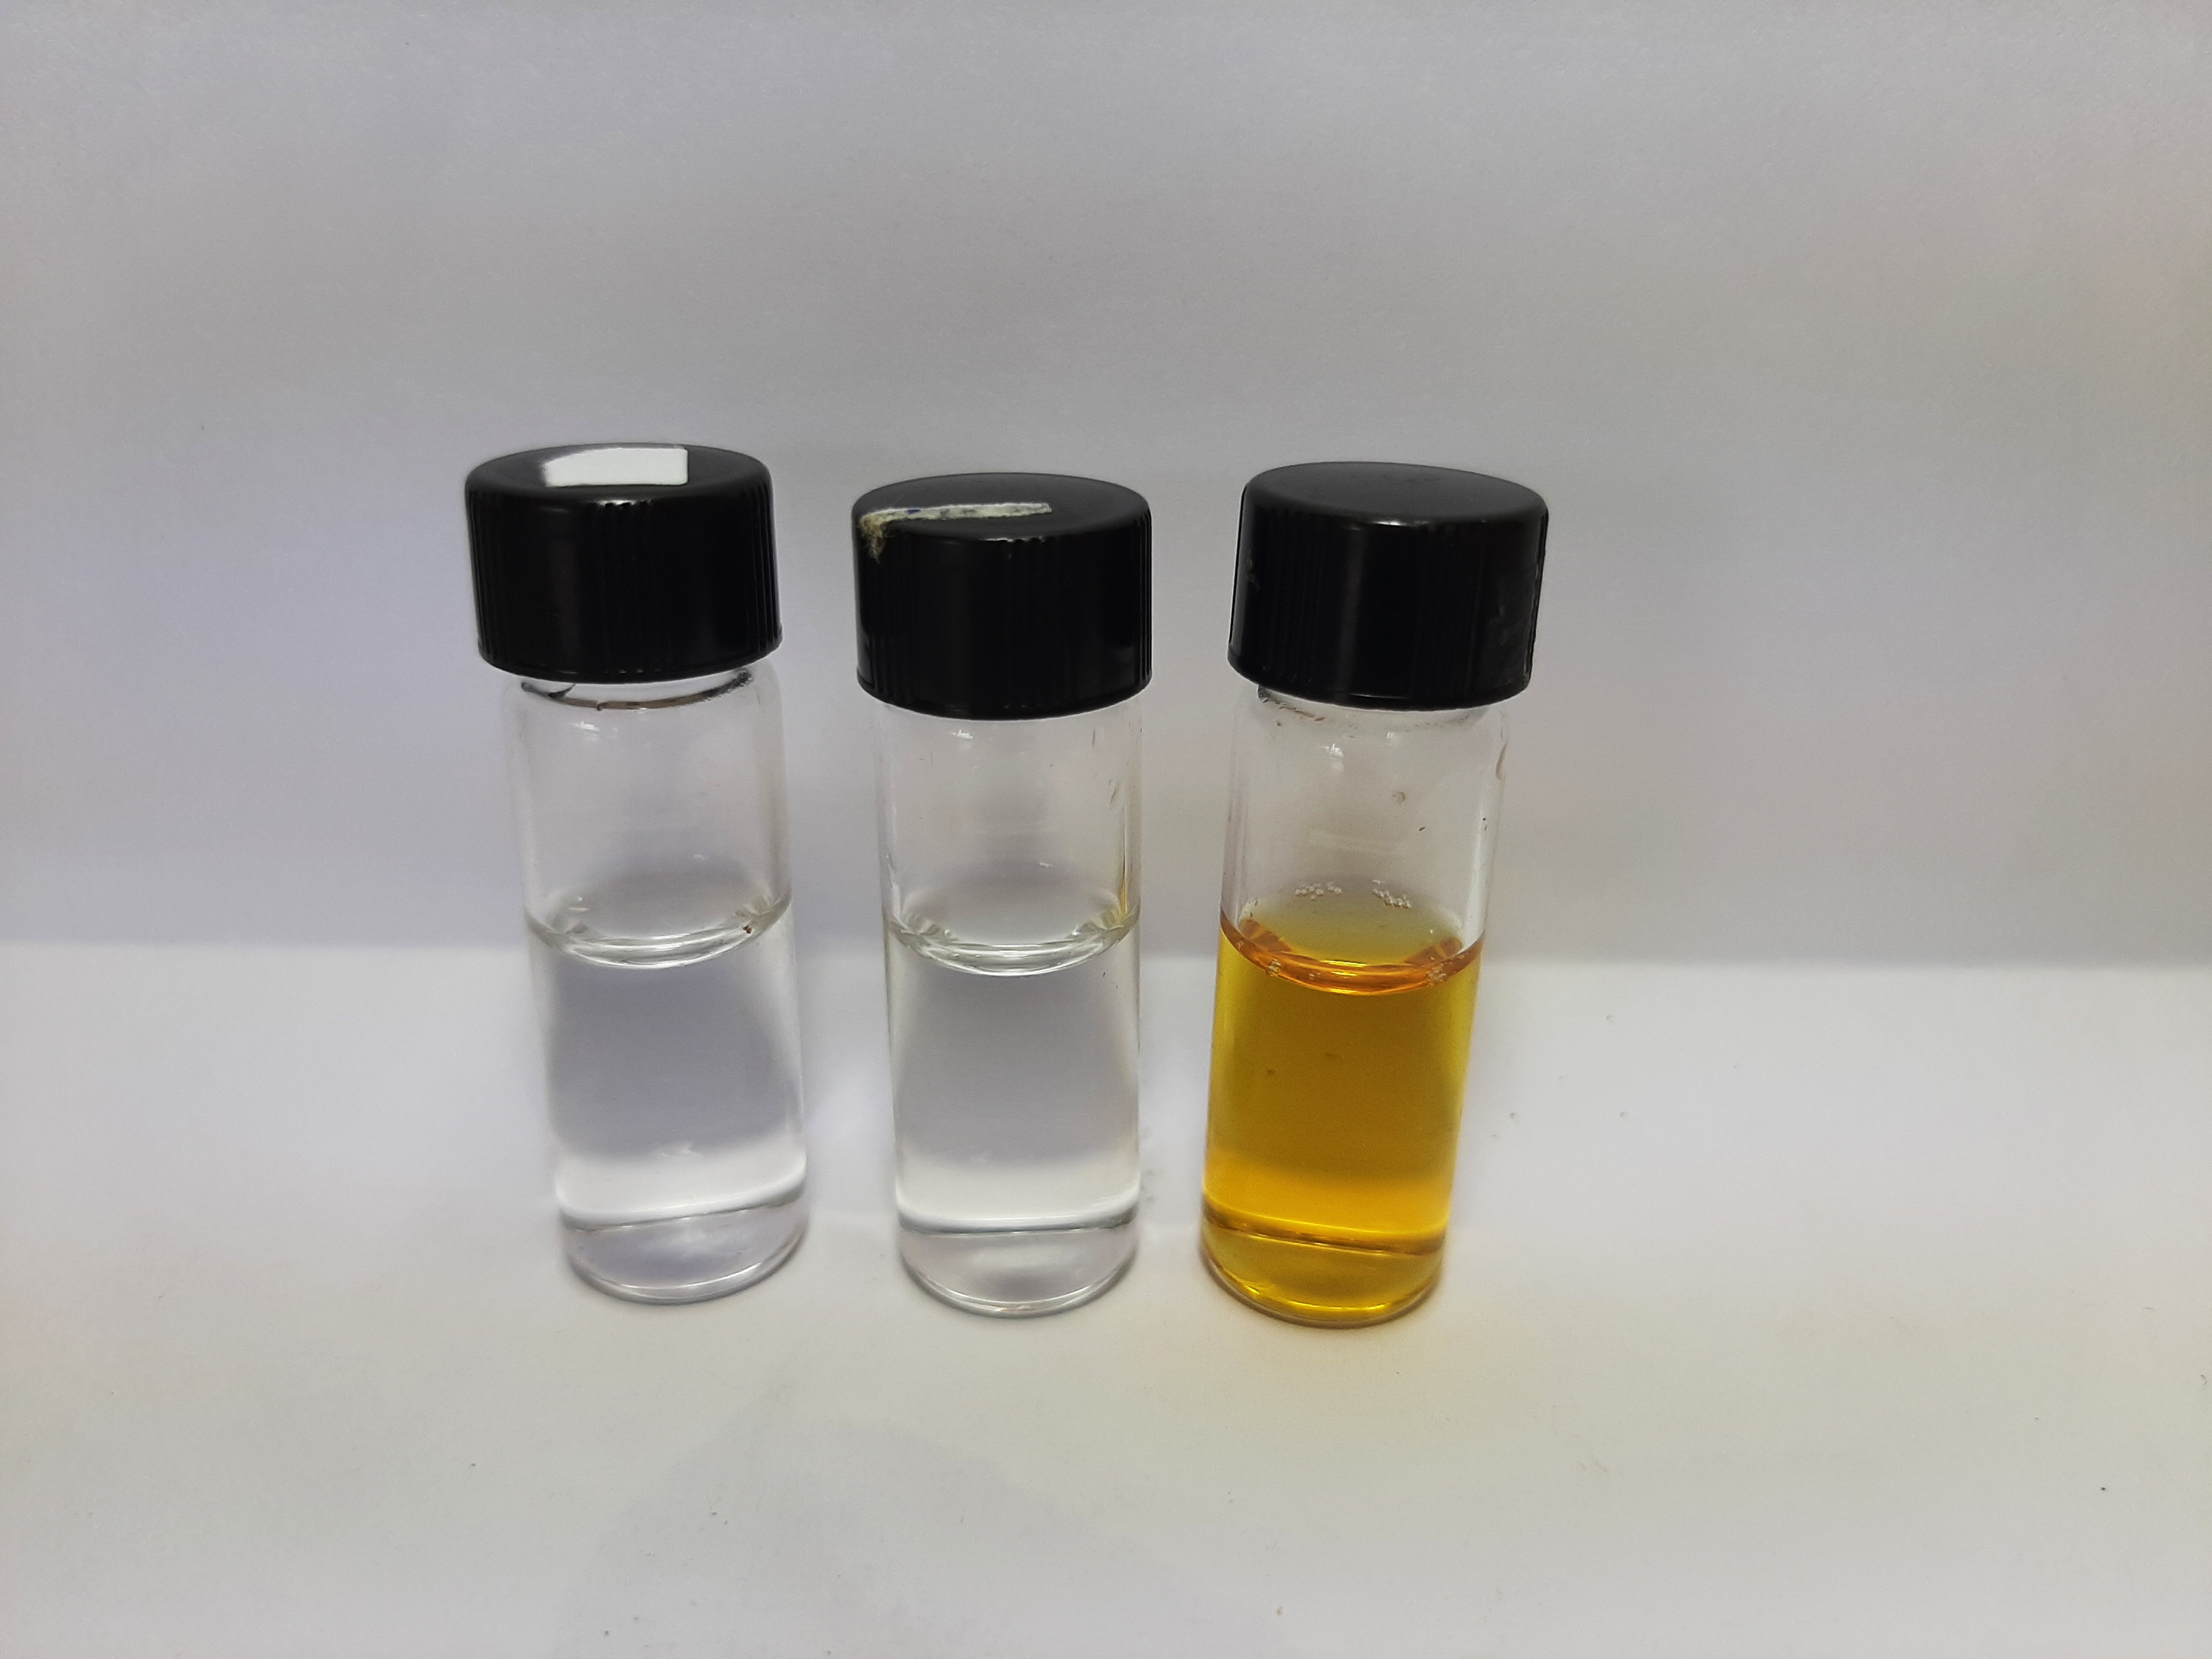


b

a

c

**Figure S2** UV-vis absorption spectra of (a) AgNO3 salt (b) AgNO3 and NaOH mixture (c) SISE, AgNO3 and NaOH mixture

**Figure S3** UV-Vis absorption spectra of SISE AgNPs synthesis at optimal conditions

**Figure S4** Plot of Absorbance at 423 nm of SISE AgNPs vs synthesis time (min)

**Figure S5** Histogram showing the distribution of particles sizes of SISE AgNPs acquired on an Image J software


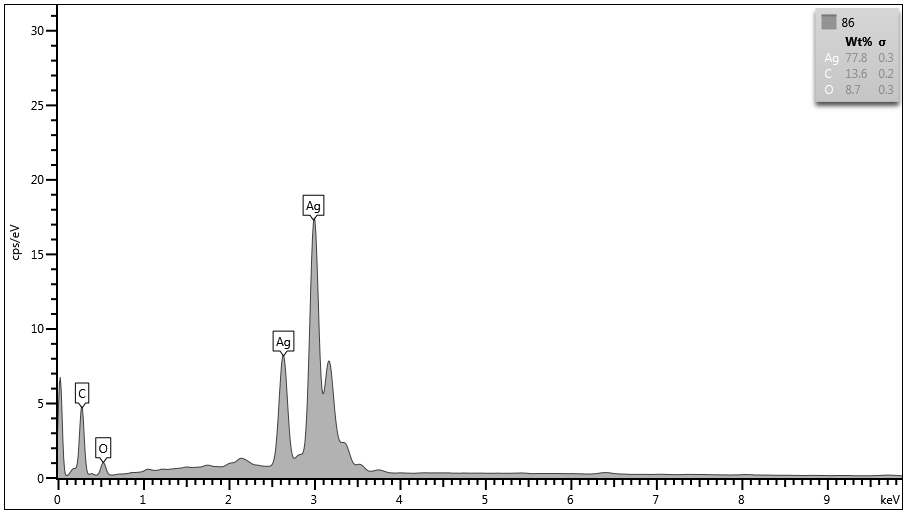

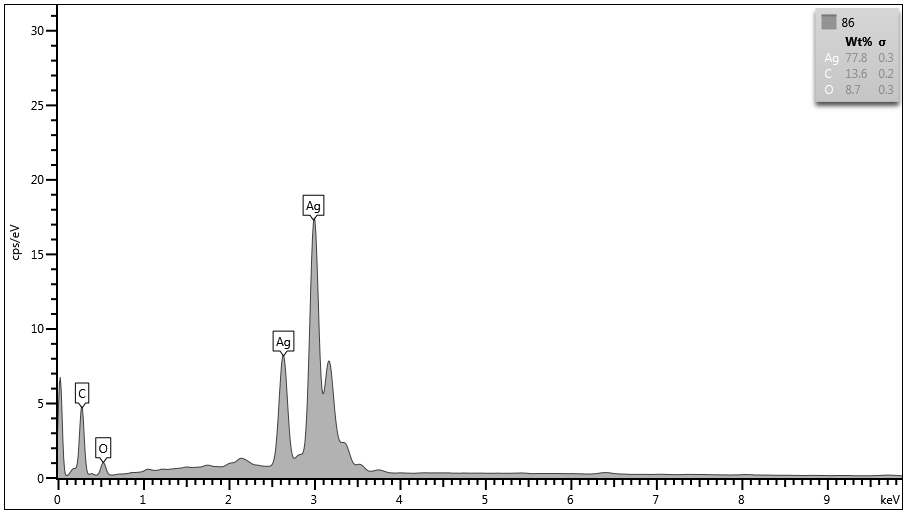


**Figure S6** EDS spectrum of as-synthesized SISE AgNPs


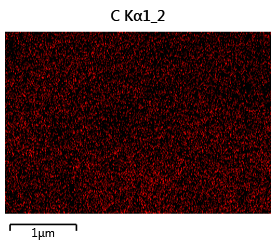


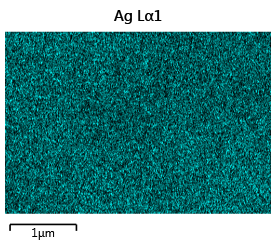


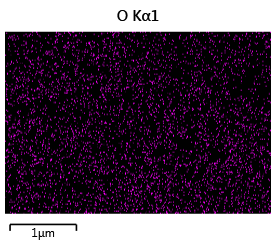


**Figure S7** Elemental mapping of SISE AgNPs showing, the presence of Ag, C and O

A

B

**Fig.S6:** A. Thermogravimetric analysis plot and B. Differential thermogravimetric plot of SISE

**Figure S8 (A)** Thermogravimetric analysis plot and **(B)** Differential thermogravimetric plot of SISE AgNPs

**Table S2:** TGA data of SISE AgNPs

| **Sample** | **Stages** | **Onset Temperature (°C)** | **Temperature ranges (°C)** | **IDT (°C)** | **IPDT (°C)** | **Mass loss (%)** | **Ash (%)** |
| --- | --- | --- | --- | --- | --- | --- | --- |
| SISE AgNPs | I | 41.75 | 41.75-169.81 | 41.75 | 1010.00 | Y = 0.71 | **59.5** |
|  | II | 169.71 | 169.71-662.22 |  |  | Y = 13.06+18.95 |  |
|  | III | 662.22 | 662.22-1010.00 |  |  | Y = 4.93+2.85 |  |
|  |  |  |  |  |  | **Total = 40.50** |  |

IDT = Initial decomposition temperature; IPDT = Integral procedural decomposition temperature.

**Blank Hg2+**

A


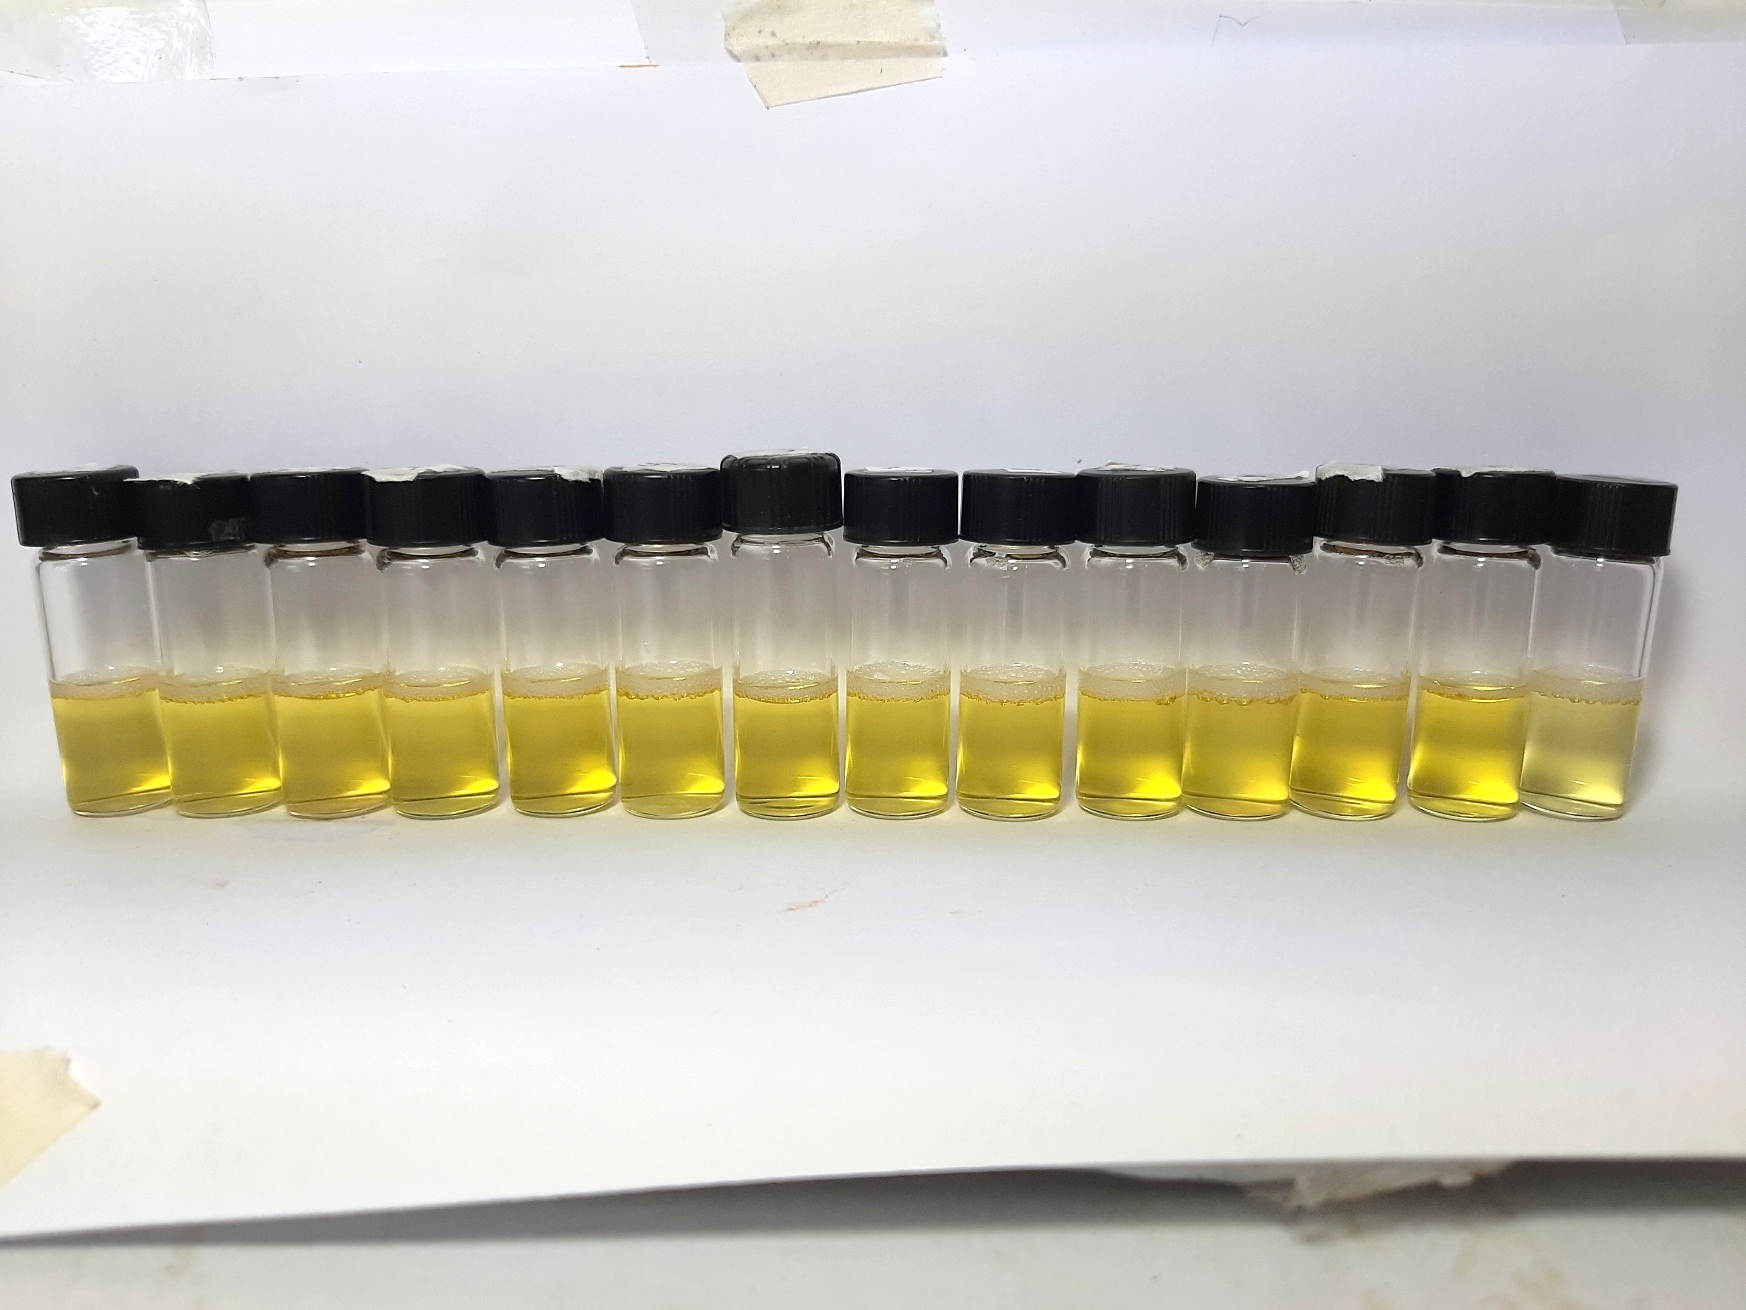


B

**Figure S9** **(A)** UV-Vis absorption spectra of SISE AgNPs in the presence of metal ions; Blank, K+, Fe3+, Ca2+, Fe2+, Co2+, Cd2+, Cu2+, Ni2+, Mg2+, Pb2+, Zn2+, Ba2+, Al3+, Hg2+, inset shows the photo images of the corresponding plots, and **(B)** Plot of A385/A423 vs metal ions, Concentration of Hg2+ =20.0 μM, while other metal ions were 50.0 μM.

**Table S3:** Comparison of SISE AgNPs probe with reported methods for Hg2+ detection.

| **Detection probe** | **LOD (nM)** | **Linear range (µM)** | **References** |
| --- | --- | --- | --- |
| Electrochemical (DPV) | 0.009 | 0.001 – 0.5 | [1] |
| Colorimetry (β-CD-AgNPs) | 37.5 | 0.2 – 2.6 | [2] |
| Colorimetry (AuNPs) | 0.275 | 0.1 – 0.5 | [3] |
| Colorimetry (CMC-AgNPs) | 5.0 | 0.0025 – 0.25 | [4] |
| Colorimetry (SA-AgNPs) | 5.29 | 0.025 – 60.0 | [5] |
| Colorimetry (AuNPs-MBT) | 6.0 | 0.05 – 1.0 | [6] |
| Colorimetry (Chlorophyll-AgNPs) | 2700 | 0.10 - 200 | [7] |
| Fluorescence | 33.0 | 0.05 – 5.8 | [8] |
| Fluorescence | 14.0 | 0.0 – 100.0 | [9] |
| SISE AgNPs | 26.5 | 0.10 – 10.0 | This work |

**DPV = Differential pulse voltammetry; β-CD = Beta cyclodextrin; CMC = Carboxymethyl cellulose; SA= Sodium alginate.**

**References**

1. Mahmoudian MR, Basirun WJ, Alias Y, et al. Investigating the effectiveness of g-C3N4 on Pt/g-C3N4/polythiophene nanocomposites performance as an electrochemical sensor for Hg2+ detection*. J Environ Chem Eng.* 2020;8(5):104204. Doi:10.1016/j.jece.2020.104204

2. Rajamanikandan R, Ilanchelian M. β-cyclodextrin functionalised silver nanoparticles as a duel colorimetric probe for ultrasensitive detection of Hg2+ and S2− ions in environmental water samples. *Mater Today Commun.* 2018;15:61-69. Doi:10.1016/j.mtcomm.2018.02.024

3. Amanulla B, Perumal KN, Ramaraj SK. Chitosan functionalized gold nanoparticles assembled on sulphur doped graphitic carbon nitride as a new platform for colorimetric detection of trace Hg2+. *Sens Actuators B: Chem.*2019;281:281-287. Doi:10.1016/j.snb.2018.10.039

4. Sakly N, Marzouk W, Ouada HB, et al. Enhancing performances of colorimetric response of carboxymethylcellulose-stabilized silver nanoparticles: a fully eco-friendly assay for Hg2+ detection. *Sens Actuators B: Chem.* 2017;253:918-927. Doi:10.1016/j.snb.2017.07.035

5. Faghiri F, Ghorbani F. Colorimetric and naked eye detection of trace Hg2+ ions in the environmental water samples based on plasmonic response of sodium alginate impregnated by silver nanoparticles. J *Hazard Mater.*2019;374:329-340. Doi:10.1016/j.jhazmat.2019.04.052

6. Jin W, Huang P, Wei G, et al. Visualization and quantification of Hg2+ based on anti-aggregation of label-free gold nanoparticles in the presence of 2-mercaptobenzothiazole. *Sens Actuators B: Chem*. 233 (2016) 223-229. Doi:10.1016/j.snb.2016.04.071

7. Yılmaz DD, Demirezen DA, Mıhçıokur H. Colorimetric detection of mercury ion using chlorophyll functionalized green silver nanoparticles in aqueous medium. *Surf Interfaces*. 2021;22:100840. Doi:10.1016/j.surfin.2020.100840

8. Wang S, Chen H, Xie H, et al. A novel thioctic acid-carbon dots fluorescence sensor for the detection of Hg2+ and thiophanate methyl via S-Hg affinity. *Food Chem.* 2021;346:128923. Doi:10.1016/j.foodchem.2020.128923

9. Wang P, Yan Y, Zhang Y, et al. An Improved Synthesis of Water-Soluble Dual Fluorescence Emission Carbon Dots from Holly Leaves for Accurate Detection of Mercury Ions in Living Cells. Int J Nanomed. 2021;16:2045. Doi: [10.2147/IJN.S298152](https://dx.doi.org/10.2147%2FIJN.S298152)
